# Supplementary material
Source: ML conference proceedings conference paper supplement (https://openaccess.thecvf.com/content/CVPR2026/html/Shinnick_Can_You_Learn_CVPR_2026_paper.html)
Supplement: Supplementary file 1 [file Shinnick_Can_You_Learn_CVPR_2026_supplemental.pdf]

## A. Procedural Warm-Up Details

We pretrain the ViT-T/16 configuration used throughout the paper for 15k steps using masked-token prediction. Table 9 summarizes the training hyperparameters.

| Setting        | Value            |
|----------------|------------------|
| Batch size     | 256              |
| Training steps | 15,000           |
| Mask ratio     | 0.5 (close-only) |
| Optimizer      | AdamW            |
| Learning rate  | $2e^{-3}$        |
| Weight decay   | 0.05             |
| Betas          | (0.9, 0.999)     |
| LR schedule    | Cosine decay     |
| Warmup steps   | 1,000            |

Table 9. Training hyperparameters for the procedural warm-up stage.

For sampling from the  $k$ -DYCK and  $k$ -DYCK SHUFFLE languages, we draw opening tokens from  $k_{\text{open}}$  types and closing tokens from  $k_{\text{close}}$  types, using an opening probability of  $p_{\text{open}} = 0.6$  whenever opening is structurally permissible.

In Section 4.3, when varying the language type, we modify only the underlying symbolic generator. When varying the pretraining length, we train a separate model for each duration by adjusting the number of training steps accordingly.

## B. Image-Based Training Details

For the experiments in Section 4.1 (Table 2), we follow the standard ViT training setup used in [56], including AdamW optimization, cosine learning-rate decay, linear warmup, RandAugment, Mixup, CutMix, and label smoothing. Across all datasets, we use a base learning rate of  $2e^{-3}$  and train for 300 epochs with 50 warmup epochs. We use a batch size of 512 for all models, except for ViT-B on IMAGENET-1K, where we use a batch size of 4096.

For the experiments in Section 4.2 (Table 3), we further fine-tune the IMAGENET-1K ViT-B checkpoints on the smaller datasets. We use the same training setup as above (with batch size 512), but train for 50 epochs with 5 warmup epochs and a base learning rate of  $5e^{-4}$ .

## C. Additional Results

| Method                           | TINY-IMAGENET | FOOD-101     | CIFAR-10     | CIFAR-100    | STL-10       |
|----------------------------------|---------------|--------------|--------------|--------------|--------------|
| Default init.                    | 55.42         | 74.52        | 91.29        | 68.52        | 60.52        |
| FractalDB warm-up                | 55.17         | 74.25        | 88.98        | 64.61        | 58.62        |
| ► FractalDB warm-up + emb.       | 55.64         | 75.99        | 90.44        | 67.35        | 65.62        |
| <b>Procedural warm-up (ours)</b> | <b>58.20</b>  | <b>79.47</b> | <b>92.81</b> | <b>71.98</b> | <b>66.48</b> |

Table 10. Comparison with warm-up on FractalDB when retaining pretrained embeddings. Unlike the main setting where embeddings are reset for consistency across methods, this variant preserves FractalDB’s patch embeddings. Our method still outperforms this baseline.

|                    | $k=16$ | $k=32$ | $k=64$       | $k=80$ |
|--------------------|--------|--------|--------------|--------|
| Procedural warm-up | 69.05  | 69.78  | <b>71.98</b> | 71.83  |

Table 11. CIFAR-100 top-1 accuracy (%) with varying vocabulary size ( $k$ ). All settings outperform random initialization, with peak performance at an intermediate vocabulary size.

| Method                           | TINY-IMAGENET                      | C100                               |
|----------------------------------|------------------------------------|------------------------------------|
| Default init.                    | $55.42 \pm 0.66$                   | $68.52 \pm 0.27$                   |
| Mimetic init.                    | $57.20 \pm 0.62$                   | $70.72 \pm 0.39$                   |
| FractalDB warm-up                | $55.17 \pm 0.33$                   | $64.61 \pm 0.51$                   |
| <b>Procedural warm-up (ours)</b> | <b><math>58.20 \pm 0.22</math></b> | <b><math>71.98 \pm 0.74</math></b> |

Table 12. Mean  $\pm$  standard deviation over 3 random seeds on representative datasets of differing scale, showing consistent gains.
